# Supplementary material for: MicroRNA-351 Regulates Two-Types of Cell Death, Necrosis and Apoptosis, Induced by 5-fluoro-2'-deoxyuridine
Source: PubMed Central journal article supplement (PMC4829180; doi:10.1371/journal.pone.0153130), 2016-04-12

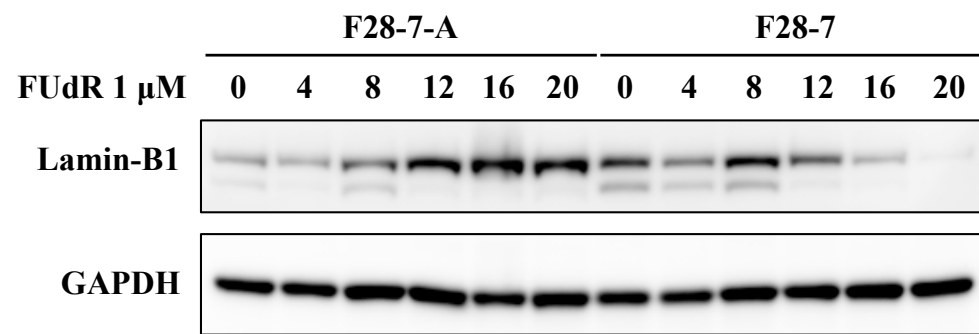

Supplement: pone.0153130.s002.pdf [file pone.0153130.s002.pdf]
